# Supplementary material for: PI3K activation prevents Aβ42-induced synapse loss and favors insoluble amyloid deposit formation
Source: PubMed Central journal article supplement — Mol Biol Cell. 2020 Feb 15;31(4):244–60. doi: 10.1091/mbc.E19-05-0303 (PMC7183762; doi:10.1091/mbc.e19-05-0303), 2020-02-15
Supplement: mbc-31-244-s001.pdf [file mbc-31-244-s001.pdf]

# Supplemental Materials

*Molecular Biology of the Cell*

Arnés et al.

## Supplementary Data

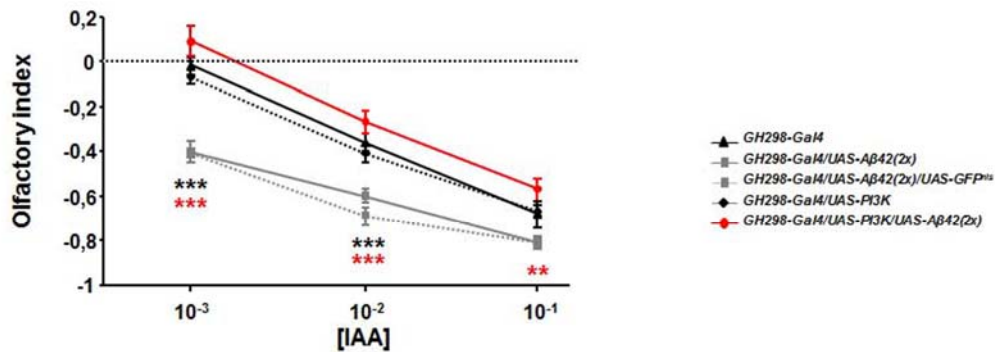

Suppl. Fig. S1

**Supplementary Figure S1.- PI3K prevents Aβ42-induced olfactory perception defects to IAA.** Adult 5-7 days aged flies were subjected to an olfactory assay for isoamyl acetate (IAA) with three concentrations (v/v). The expression of two different Aβ42 constructs in the *GH298-Gal4* domain (genotypes: *GH298-Gal4/UAS-Aβ42* and *GH298-Gal4/UAS-Aβ42/UAS-GFP<sup>nl5</sup>*, full and dotted grey lines respectively) yields more repulsive responses to [10<sup>-3</sup>] and [10<sup>-2</sup>] compared to *GH298-Gal4* controls (full black line) and *GH298-Gal4/UAS-PI3K* flies (dotted black line). The inducible PI3K form (*UAS-PI3K<sup>92D</sup>*) is used in this experiment. However, when PI3K and Aβ42 were co-expressed in GH298 neurons [genotype: *GH298-Gal4/UAS-PI3K/UAS-Aβ42(2X)*], the olfactory index returned to the normal profile (red line). Black asterisks: comparisons between *GH298-Gal4/UAS-Aβ42* and *GH298-* with respect to control. Red asterisks: comparisons between *GH298-Gal4/UAS-Aβ42* and *GH298-Gal4/UAS-PI3K/UAS-Aβ42* flies. \*\*p<0.001; \*\*\*p<0.0001 (unpaired Student's *t* test with Welch's correction).

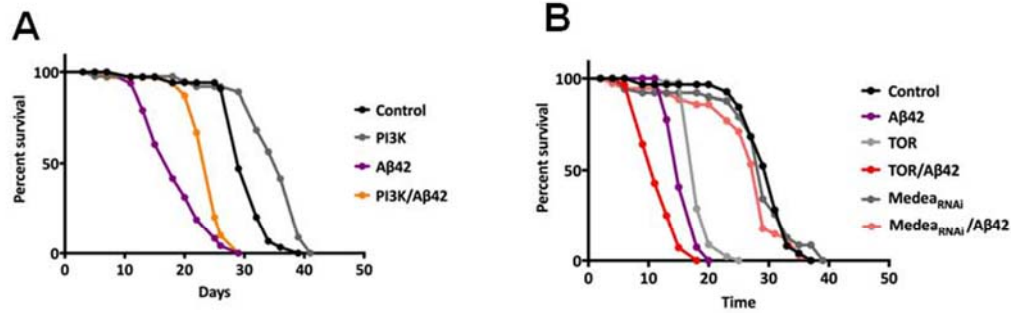

Suppl. Fig. S2

**Supplementary Figure S2.- Aβ42-induced reduction of lifespan is prevented by PI3K synaptogenesis signaling.**(A) Longevity profiles of color coded genotypes at 29°C. PI3K activation suppresses the lifespan reduction caused by Aβ42 to a large extent. Numerical data are shown in **Supp. Table S1.**(B) Equivalent profiles for other genotypes including factors that do not participate in the PI3K synaptogenic pathway, mTOR, or included in that signaling, Medea<sup>RNAi</sup>. Note the full suppression by the later factor and the enhanced lifespan reduction caused by mTOR. Numerical data are shown in **Supp. Table S1.**

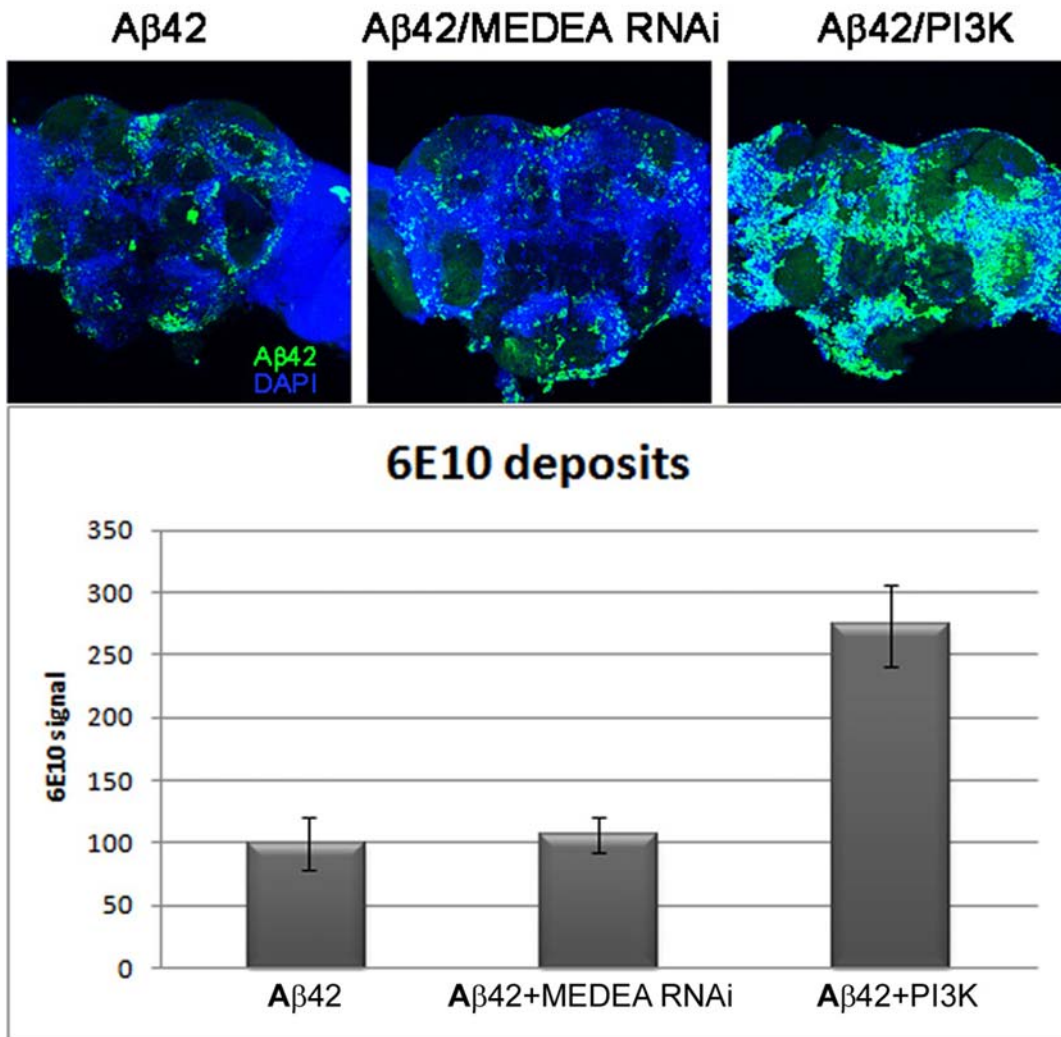

Suppl.Fig. S3

**Supplementary Figure S3.-Medea downregulation does not increase Aβ42 deposits.** Upper panels show confocal images of frontal views of 15 days old adult females expressing *UAS-Aβ42 (2X)* and *UAS-PI3K* or *UAS-Medea<sup>RNAi</sup>* and stained with 6E10 antibody. Note the increased Aβ deposits in the PI3K brain, but not in the Medea<sup>RNAi</sup>. Lower panel shows the quantification of the 6E10 signal in the whole stack of brain images in each genotype. A total of three brains per genotype were analyzed. Cell nuclei are marked by DAPI.

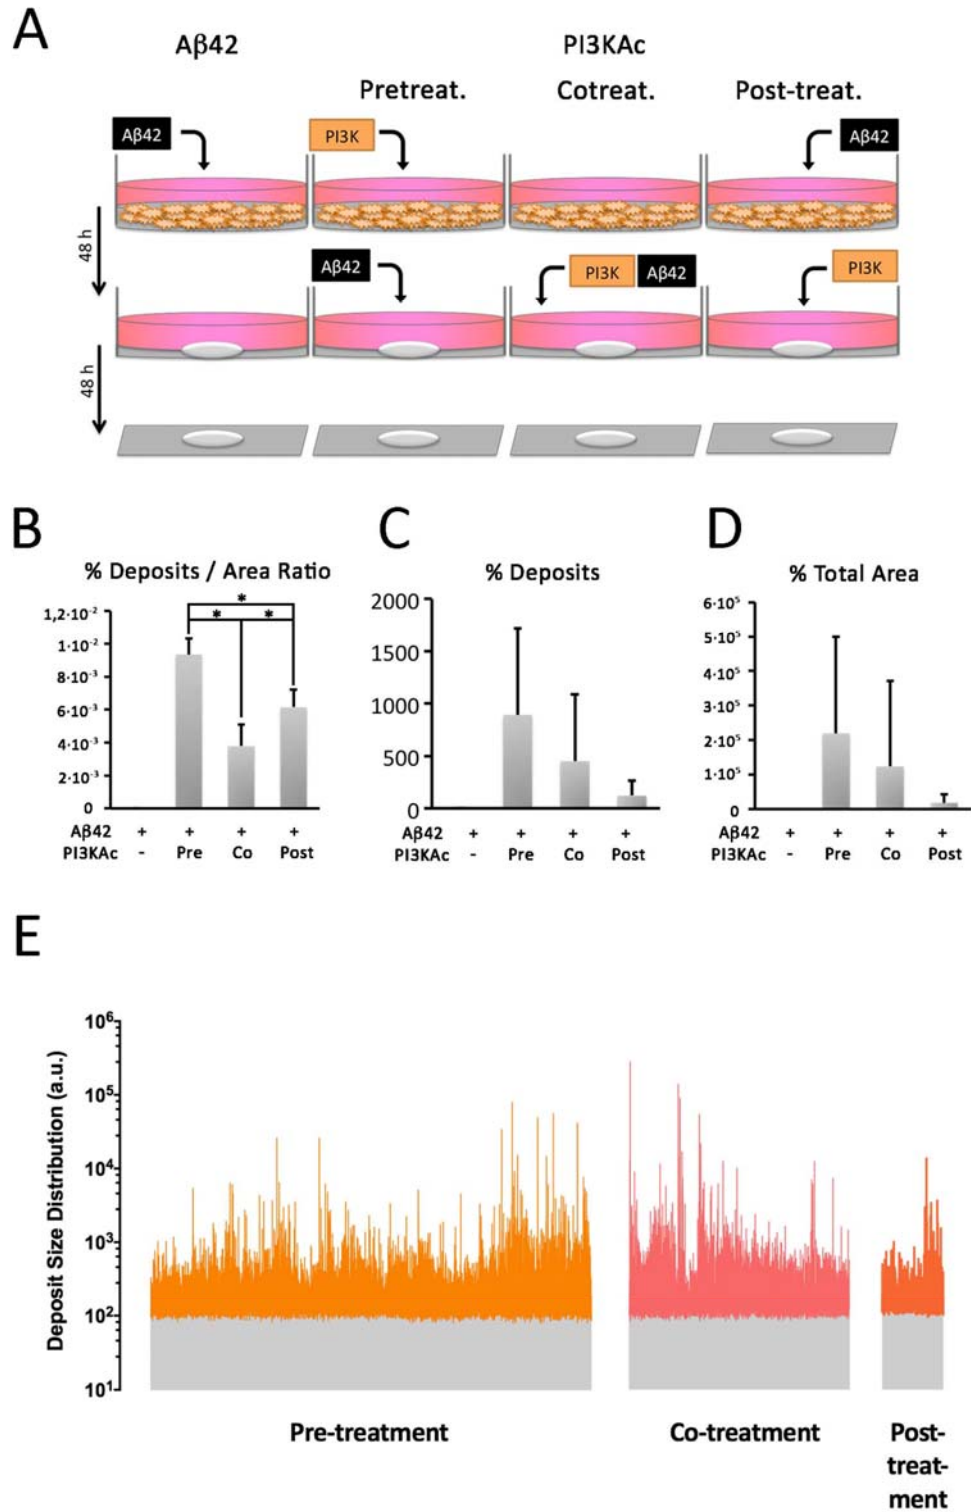

Suppl.Fig.S4

**Supplementary Figure S4.- PI3K-induced increase in A $\beta$ 42 aggregation can be reproduced outside the cell.** (A) Cartoon representing the experimental design with SHT-SY5Y differentiated cells treated with A $\beta$ 42 oligomers (36 $\mu$ g/ml) and PTD-PI3KAc peptide (50 $\mu$ g/ml) at different times of administration. Supernatants were stained with 6E10 antibody. Cells treated only with A $\beta$ 42 oligomers were used as control. (B-E) Histograms representing percentage of deposits/area ratio (B), percentage of deposits (C), percentage total area (D), and deposit size distribution (E) of A $\beta$ 42 and PI3K/A $\beta$ 42 treated cells. Control cells treated only with A $\beta$ 42 oligomers did not develop recognizable 6E10 positive deposits.

| Over 4 cm / Paired T test (Two-tailed P value) |              |              |          |           |
|------------------------------------------------|--------------|--------------|----------|-----------|
| Genotypes                                      | Control      | PI3K         | Aβ42     | PI3K/Aβ42 |
| Control                                        |              |              |          |           |
| PI3K                                           | 0,6588       |              |          |           |
| Aβ42                                           | < 0,0001**** | < 0,0001**** |          |           |
| PI3K/Aβ42                                      | 0,0001****   | < 0,0001**** | 0,0028** |           |

  

| Bellow 4 cm / Paired T test (Two-tailed P value) |         |        |        |           |
|--------------------------------------------------|---------|--------|--------|-----------|
| Genotypes                                        | Control | PI3K   | Aβ42   | PI3K/Aβ42 |
| Control                                          |         |        |        |           |
| PI3K                                             | 0,2399  |        |        |           |
| Aβ42                                             | 0,4581  | 0,206  |        |           |
| PI3K/Aβ42                                        | 0,9078  | 0,7581 | 0,2074 |           |

  

| Bottom / Paired T test (Two-tailed P value) |         |        |         |           |
|---------------------------------------------|---------|--------|---------|-----------|
| Genotypes                                   | Control | PI3K   | Aβ42    | PI3K/Aβ42 |
| Control                                     |         |        |         |           |
| PI3K                                        | 0,2775  |        |         |           |
| Aβ42                                        | 0,0194* | 0,037* |         |           |
| PI3K/Aβ42                                   | 0,136   | 0,5057 | 0,0379* |           |

  

| Over 4 cm / Paired T test (Two-tailed P value) |          |         |        |           |            |                 |
|------------------------------------------------|----------|---------|--------|-----------|------------|-----------------|
| Genotypes                                      | Control  | Aβ42    | mTOR   | mTOR/Aβ42 | Medea-RNAi | Medea-RNAi/Aβ42 |
| Control                                        |          |         |        |           |            |                 |
| Aβ42                                           | 0,031*   |         |        |           |            |                 |
| mTOR                                           | 0,0082** |         |        |           |            |                 |
| mTOR/Aβ42                                      | 0,047*   | 0,1537  | 0,0549 |           |            |                 |
| Medea-RNAi                                     | 0,0031** |         |        |           |            |                 |
| Medea-RNAi/Aβ42                                | 0,0018** | 0,0436* |        |           | 0,3396     |                 |

  

| Bellow 4 cm / Paired T test (Two-tailed P value) |         |        |        |           |            |                 |
|--------------------------------------------------|---------|--------|--------|-----------|------------|-----------------|
| Genotypes                                        | Control | Aβ42   | mTOR   | mTOR/Aβ42 | Medea-RNAi | Medea-RNAi/Aβ42 |
| Control                                          |         |        |        |           |            |                 |
| Aβ42                                             | 0,4831  |        |        |           |            |                 |
| mTOR                                             | 0,9284  |        |        |           |            |                 |
| mTOR/Aβ42                                        | 0,7438  | 0,3288 | 0,7136 |           |            |                 |
| Medea-RNAi                                       | 0,0835  |        |        |           |            |                 |
| Medea-RNAi/Aβ42                                  | 0,2212  | 0,3384 |        |           | 0,4637     |                 |

  

| Bottom / Paired T test (Two-tailed P value) |         |         |        |           |            |                 |
|---------------------------------------------|---------|---------|--------|-----------|------------|-----------------|
| Genotypes                                   | Control | Aβ42    | mTOR   | mTOR/Aβ42 | Medea-RNAi | Medea-RNAi/Aβ42 |
| Control                                     |         |         |        |           |            |                 |
| Aβ42                                        | 0,6361  |         |        |           |            |                 |
| mTOR                                        | 0,0708  |         |        |           |            |                 |
| mTOR/Aβ42                                   | 0,8737  | 0,0394* | 0,0665 |           |            |                 |
| Medea-RNAi                                  | 0,1166  |         |        |           |            |                 |
| Medea-RNAi/Aβ42                             | 0,1079  | 0,5755  |        |           | 0,6394     |                 |

  

| Genotype                             | n  | Median Surv | Maximum Surv | Mantel-Cox test |
|--------------------------------------|----|-------------|--------------|-----------------|
| <i>Group VS Control</i>              |    |             |              |                 |
| Control (UAS-LacZ/+)                 | 30 | 29          | 36           |                 |
| PI3K (UAS-PI3K caax/+)               | 34 | 36 (+24%)   | 39 (+8%)     | p < 0,0001      |
| Aβ42 (UAS-2xAb42/+)                  | 48 | 18 (-38%)   | 24 (-33%)    | p < 0,0001      |
| PI3K/Aβ42 (UAS-PI3K caax/UAS-2xAb42) | 30 | 25 (-14%)   | 27 (-25%)    | p < 0,0001      |
| <i>PI3K/Aβ42 VS Aβ42</i>             |    |             |              |                 |
| Aβ42 (UAS-2xAb42/+)                  | 48 | 18          | 24           |                 |
| PI3K/Aβ42 (UAS-PI3K caax/UAS-2xAb42) | 30 | 25 (+38%)   | 27 (+12%)    | p < 0,0001      |

  

| Genotype                                  | n  | Median Surv | Maximum Surv | Mantel-Cox test |
|-------------------------------------------|----|-------------|--------------|-----------------|
| <i>Group VS Control</i>                   |    |             |              |                 |
| Control (UAS-LacZ/+)                      | 25 | 31          | 35           |                 |
| Aβ42 (UAS-2xAb42/+)                       | 27 | 15 (-52%)   | 20 (-43%)    | p < 0,0001      |
| mTOR (UAS-mTOR/+)                         | 45 | 18 (-42%)   | 23 (-34%)    | p < 0,0001      |
| mTOR/Aβ42 (UAS-mTOR/UAS-2xAb42)           | 28 | 11 (-64%)   | 15 (-57%)    | p < 0,0001      |
| Med RNAi (UAS-MedeaRNAi/+)                | 46 | 29 (-6%)    | 37 (+6%)     | p = 0,9609      |
| Med RNAi/Aβ42 (UAS-Medea RNAi/UAS-2xAb42) | 34 | 29 (-6%)    | 35 (+)       | p = 0,1482      |
| <i>PI3K/Aβ42 VS Aβ42</i>                  |    |             |              |                 |
| Aβ42 (UAS-2xAb42)                         | 27 | 15          | 20           |                 |
| mTOR/Aβ42 (UAS-mTOR/UAS-2xAb42)           | 28 | 11 (-39%)   | 15 (-25%)    | p < 0,0001      |
| Med RNAi/Aβ42 (UAS-Medea RNAi/UAS-2xAb42) | 34 | 29 (+61%)   | 35 (+75%)    | p < 0,0001      |

## Suppl. Table S1

**Supplementary Table S1.**-Data from climbing and lifespan assays with the corresponding statistical tests. Climbing assay performance is color coded as in main Figures 2 and 6.
